# Supplementary material
Source: MDPI journal article supplement (https://www.mdpi.com/2673-3978/2/2/12)
Supplement: s1 [file s1]

Archive with 1 entries (1 files):
- electronicmat-1215164-SI.pdf
